# Supplementary material
Source: PubMed Central journal article supplement (PMC3310699)

# Supplemental Figure 2

A

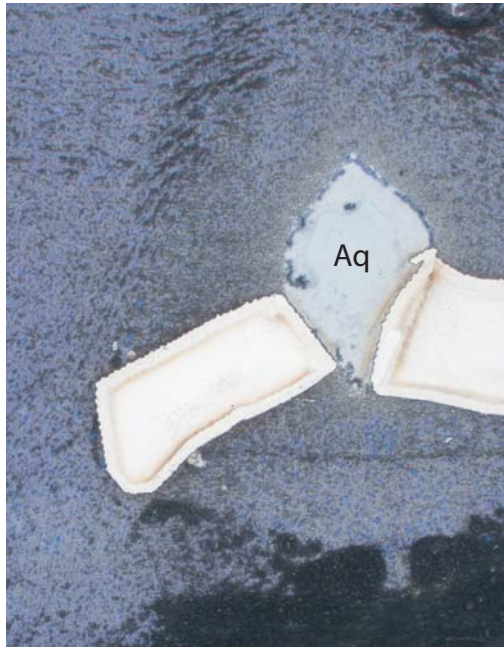

Activation of PKC $\alpha$  or PKC $\epsilon$  as an approach to increase morphine tolerance in respiratory depression and lethal overdose

Hong-Yiou Lin, Ping-Yee Law, and Horace H. Loh  
Journal of Pharmacology and Experimental Therapeutics

B

Aq-Cerebral Aqueduct

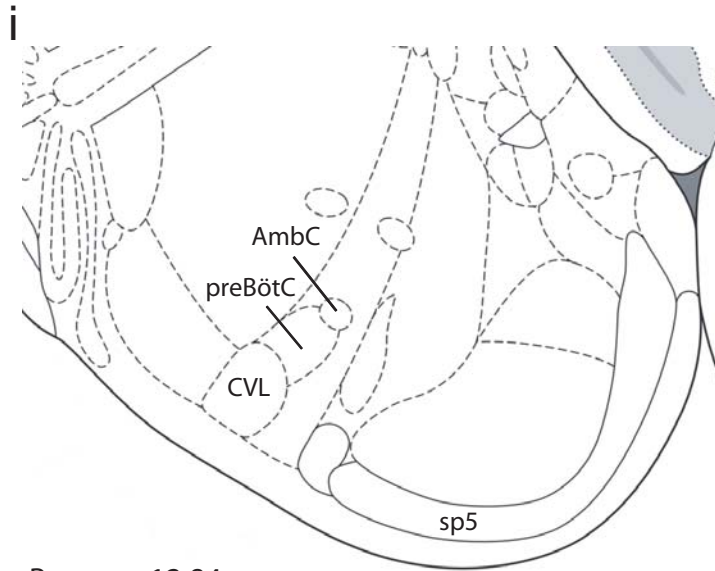

Bregma -12.84 mm

ii

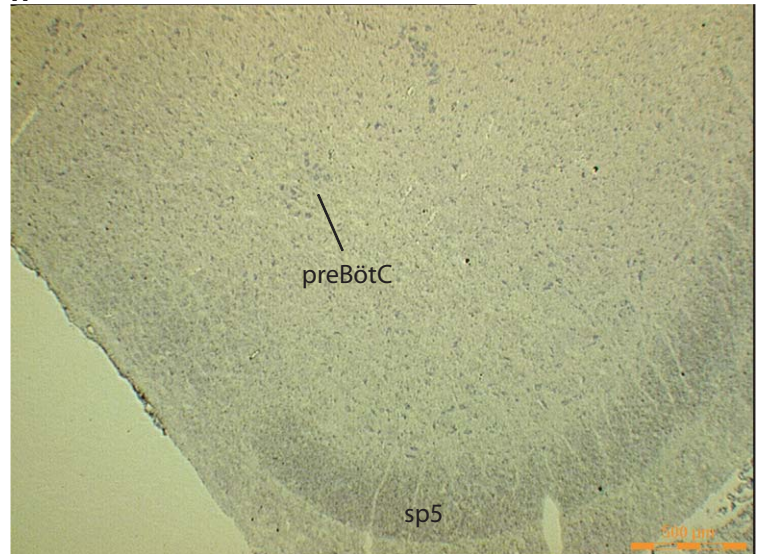

iii

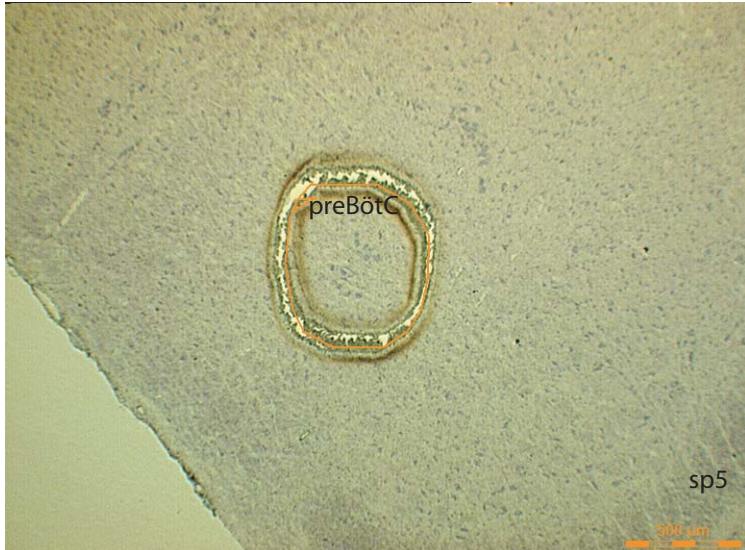

iv

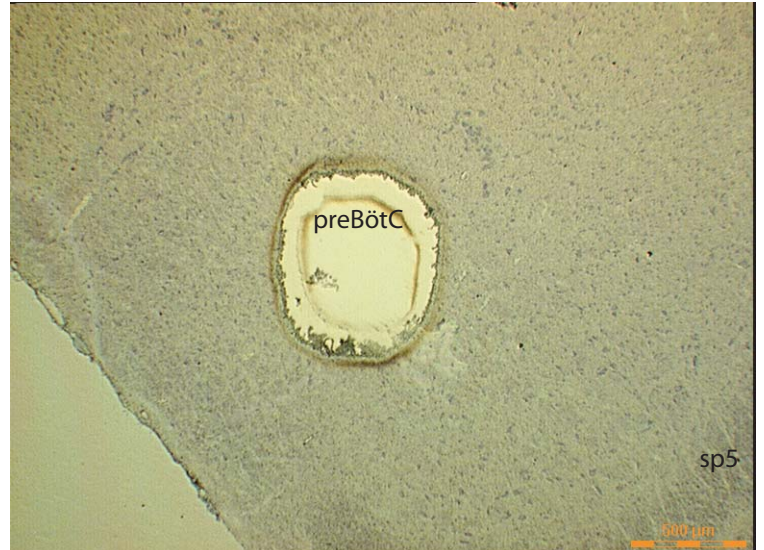

Supplement: supp_111.188235_JPET188235_suppl_figure_2.pdf [file supp_111.188235_JPET188235_suppl_figure_2.pdf]
