# Supplementary material
Source: PubMed Central journal article supplement (PMC3310699)

# Supplemental Figure 1

A

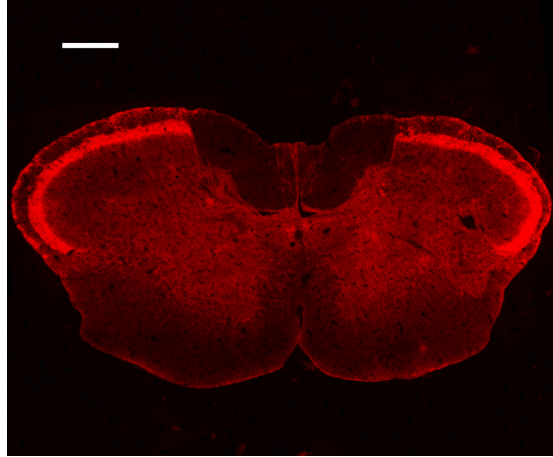

B

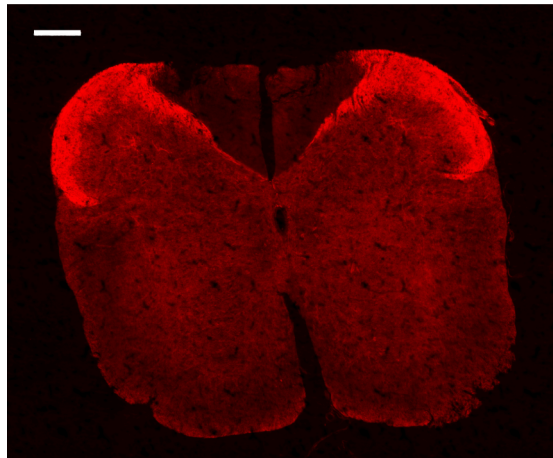

C

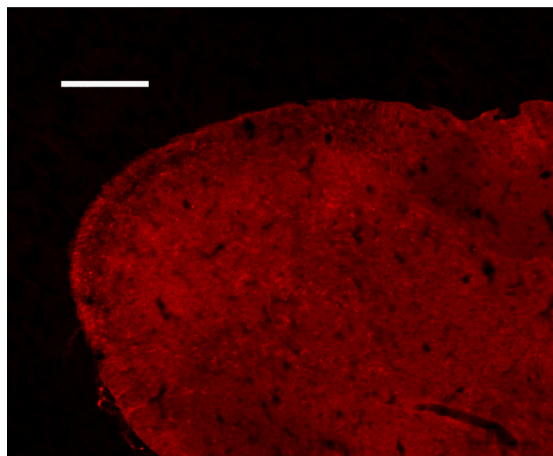

Supplement: supp_111.188235_JPET188235_suppl_figure_1.pdf [file supp_111.188235_JPET188235_suppl_figure_1.pdf]
